# Supplementary material for: Metabolomics Reveals the Allelopathic Potential of the Invasive Plant Eupatorium adenophorum
Source: MDPI journal article supplement (doi:10.3390/plants10071473), 2021-07-19
Supplement: s1 [file s1]

Table S1. Differential metabolites impacted by L, M and H extract solutions. Red represents up regulation, green represents down regulation, yellow represents no consistent regulation in different groups.

| a(27)                          | b(12)                                  | c(12)                | d(45)                             | e(15)                   | f(9)                  | g(25)                            |
|--------------------------------|----------------------------------------|----------------------|-----------------------------------|-------------------------|-----------------------|----------------------------------|
| tyrosine                       | valine                                 | D-alanyl-D-alanine   | (S)-Mandelic acid                 | 3-hydroxybutyric acid   | citrulline            | glutamic acid                    |
| 1-Hydroxyanthraquinone         | threonine                              | ornithine            | 1-Methylhydantoin                 | 3-Hydroxynorvaline      | glutamine             | N-Acetyltryptophan               |
| 2-Indanone                     | Isoleucine                             | 2-Deoxytetronic acid | 22-Ketocholesterol                | 8-Aminocaprylic acid    | L-cysteine            | proline                          |
| 2-ketobutyric acid             | L-glutamic acid                        | sorbitol             | 2-Deoxyerythritol                 | Acetol                  | methionine            | maleic acid                      |
| Analyte 677                    | alanine                                | Glucose-1-phosphate  | 2-Furoic Acid                     | adenosine               | 2-Deoxy-D-galactose   | malonic acid                     |
| ascorbate                      | fructose                               | Gallic acid          | 3-Cyanoalanine                    | alpha-ketoglutaric acid | D-Talose              | urea                             |
| benzamide                      | Levogluconan                           | 2-aminoethanethiol   | 3-hydroxy-3-methylglutaric acid   | Cellobiotol             | maltose               | Pyruvic acid                     |
| Benzoylformic acid             | glycerol                               | adenine              | 3-hydroxy-L-proline               | creatine degr           | Tagatose              | Gentiobiose                      |
|                                |                                        |                      |                                   |                         | O-                    |                                  |
| beta-Hydroxymyristic acid      | Ethanolamine                           | 2-Monoolein          | 5,6-Dimethylbenzimidazole         | D-galacturonic acid     | Phosphorylethanolamin | Glucoheptonic acid               |
| carbamoyl-aspartic acid        | cycloleucine                           | Leucrose             | 5-Aminovaleric acid               | Dithioerythritol        | e                     | glucose                          |
| Carbobenzyloxy-L-leucine degr2 | xylose                                 | Malonamide           | 5-Hydroxyindole-2-carboxylic acid | L-Malic acid            |                       | Sedoheptulose                    |
| Cumic Acid                     | Isopropyl-beta-D-thiogalactopyranoside | Purine riboside      | 5-Methoxytryptamine               | maltotriose             |                       | N-Methylantranilic acid          |
| Digalacturonic acid            |                                        |                      | Acetophenone                      | phosphate               |                       | 2-amino-2-methylpropane-1,3-diol |
| Ethyl cinnamate                |                                        |                      | Alizarin                          | quinic acid             |                       | pyrogallol                       |
| indole-3-acetamide             |                                        |                      | Allantoic acid                    | serine                  |                       | indole-3-acetic acid             |
| inosine                        |                                        |                      | alpha-D-glucosamine 1-phosphate   |                         |                       | Dodecanol                        |
| L-homoserine                   |                                        |                      | Aminooxyacetic acid               |                         |                       | ribulose-5-phosphate             |

lysine  
N-Acetyl-beta-D-mannosamine  
naringenin  
Norleucine  
oxamide  
panthenol  
saccharopine  
succinic acid  
uracil  
xylitol

asparagine  
beta-Mannosylglycerate  
Carbobenzyloxy-L-leucine  
D-erythronolactone  
D-erythro-sphingosine  
dibenzofuran  
L-Allothreonine  
L-dopa  
leucine  
Maleamate  
Maleimide  
methyl octanoate  
Mono(2-ethylhexyl)phthalate  
N-Carbamylglutamate  
N-Ethylglycine  
nicotinic acid  
Nicotinoylglycine  
noradrenaline  
norvaline  
oxalic acid  
oxoproline  
palatinitol  
p-benzoquinone  
Phenyl beta-D-glucopyranoside  
Phytanic acid

(2R,3S)-2-hydroxy-3-  
isopropylbutanedioic  
acid  
2,3-Dihydroxypyridine  
2,6-Diaminopimelic acid  
2-hydroxypyridine  
Analyte 731  
D-Glyceric acid  
epsilon-Caprolactam  
N-Acetylisatin

phytosphingosine

thymine

trehalose

---
